# Supplementary material for: Muscle Microvascular Dysfunction in Central Obesity Is Related to Muscle Insulin Insensitivity but Is Not Reversed by High-Dose Statin Treatment
Source: Oxford University Press journal article supplement (doi:10.2337/db08-1688), 2009-02-10
Supplement: db08-16881_suppl.doc [file db08-16881_suppl.doc]

**Supplemental information**

**Muscle Microvascular Dysfunction in Central Obesity is Related to Muscle Insulin Insensitivity but is not Reversed by High-Dose Statin Treatment**

**Clough et al.**

**Materials and Methods**

Identification of suitable participants was based on a screening visit. This consisted of a brief interview, eliciting previous relevant medical history, resting blood pressure, anthropometry (waist circumference, body mass index (BMI) and sampling of plasma glucose, lipid profile, thyroid, liver and renal function tests after a 12 hour fast.

Subjects were encouraged to maintain their normal diet and lifestyle throughout the duration of the study to avoid changes in body weight >5% from baseline body weight, thus to minimise the effects of potential confounding effects of changes in body weight or activity on the study results. Subjects were weighed in light clothing to the nearest 0.1 kilogram using a Seca electronic scale and height was measured using a Seca 220 stadiometer to the nearest 0.1 cm. BMI was calculated according to the formula (weight in kg)/([height in metres]). Anatomical waist circumference was measured over bare skin midway between the costal margin and the iliac crest.. Blood pressure was measured for both screening assessment and the main study using the OMRON 705CP blood pressure monitor.

The forty subjects recruited to the study attended the Wellcome Trust Clinical Research Facility at Southampton University Hospitals Trust on approximately 4 different occasions for baseline phenotyping studies. Both active drug and placebo tablets were supplied by Pfizer as part of an Independent Research grant to the Investigators and both tablets were identical in appearance.

Plasma glucose from OGTT was measured on samples collected in fluoride oxalate tubes by hexokinase method on Beckman Unicel DXC800 (Beckman Coulter, Fullerton, CA, USA) and during the clamp studies measured on samples collected in lithium heparin tubes by the glucose oxidase method using a YSI 2300 STAT glucose analyser (Yellow Springs, Ohio, USA). Total cholesterol, high-density lipoprotein (HDL) cholesterol and triacylglycerols were measured on fasting serum samples using enzymatic colorimetric methods on Beckman Unicel DXC800 automated analyzer (Beckman Coulter, Fullerton, CA, USA). HBA1c was measured by HPLC using a cation exchange cartridge on Bio-Rad Variant II Turbo (Bio-Rad Laboratories, Irvine, CA, USA) . A two point calibration of the calculated data was used to align the results with the DCCT standard.

C-reactive protein (hsCRP) and soluble ICAM-1 were measured in plasma at 0 and 26 weeks in all subjects.

**Hyperinsulinaemic euglycaemic clamps.** Clamps were undertaken in the morning after a 12 h overnight fast. All subjects were asked to abstain from alcohol and strenuous exercise for 48 hours prior to testing.

Two points of venous access were established in the same arm. The first was obtained by retrograde cannulation of a vein on the dorsum of the hand with the 20g cannula. This hand was warmed to 50C in a hotbox to improve oxygenation of venous blood thus providing ‘arterialised’ venous blood samples 1. The level of oxygenation was checked at 2-3 time points during the clamp by measurement of blood gases. The arterialised venous blood samples were used for glucose and insulin concentration measurement. Blood glucose measurements were recorded every 5 minutes (YSI 2300 STAT glucose analyser). Blood samples for insulin measurements were taken at baseline, 90, 120 minutes and at 10 minutes intervals during the last 30 minutes of insulin infusion, separated and the plasma frozen at -80C for analysis. The second venous access was established in the antecubital fossa with the 18g gauge cannula for exogenous insulin infusion. Human insulin (Actrapid), Novo Nordisk) was given at a rate of 0.2mIU/kg/min for one hour and then at the continuous rate of 1.5mIU/kg/min for 2 hours after 7-minutes of stepped priming infusion using a syringe driver (Syramed usp 6000). The insulin infusion was prepared in 0.9% NaCl to which 1ml of subject’s blood was added to prevent adsorption of insulin to the plastic surface of the syringe walls. Blood glucose concentrations were maintained at a target of 5 mmol/l by adjusting the rate of 20% Dextrose infusion, based on the plasma glucose measurements obtained at 5 minute intervals using a variable-speed infusion pump (Volumed uVP5005). Subjects were rested for 1 hour after the venous cannulation, before insulin infusion was begun. Intact insulin was analysed using the dissociation-enhanced lanthanide fluroimmunoassay (DELFIA) method and Wallac 1420 mutilabel counter. All standards, quality controls and samples were analysed in duplicate.

**Microvascular function.** Subjects lay supine in a quiet room at an ambient temperature of 20˚C. The studied calf was supported at heart level, with the mid-calf region free for the attachment of the plethysmographic sensor. The Filtrass strain gauge sensor unit, with its inelastic nylon measuring line, in its flexible guide-holder, was placed around the calf at the point of maximum circumference and attached to the Filtrass sensor itself. At the start of the protocol, the strain gauge automatically measured the calf circumference, adjusted its tension and then calibrated itself.  A congestion cuff was wrapped around the ipsilateral thigh and coupled into the Filtrass unit for automatic inflation during the protocol. For these studies we used a specifically designed, set protocol. After applying the start pressure of 4.0 mmHg, three initial pressure steps of 60 mmHg were applied, each for 10 seconds, with an intervening rest phase of 20 seconds at 4.0 mmHg. These were to measure limb blood flow, derived from the initial slope of the response. Small (~10 mm Hg) cumulative increases in congestion pressure, from zero to a pressure not exceeding subjects’ diastolic blood pressure, were then applied. Each step was sustained for just over 4 minutes.  Further assessments of blood flow were made at the end of each cumulative pressure step, by raising the cuff pressure to 80 mmHg, for 10 seconds, followed by 50 seconds rest at the preceding cumulative pressure. The strain gauge tension was automatically re-balanced, to the starting tension, at the end of each component of the pressure protocol; this procedure minimised pitting. The whole protocol, which took between 30 and 40 minutes, was saved, at the end of the study, for off-line, blinded analysis.

The values for blood flow at each cumulative pressure step were normalized by expressing them as a percentage of the resting Qa value. We used the Darcy equation, that governs blood flow through parallel circuits of the cardiovascular system, Qa = (Pa-Pv)/R, where R is the peripheral vascular resistance, Pa is the arteriolar and Pv the venous hydrostatic pressure, respectively 2 together with the values of venous congestion pressure, at each pressure step, to calculate the value of blood flow that would have been expected had the pre-capillary resistance remained constant throughout the procedure. Leg peripheral vascular resistance was calculated from blood flow and leg MABP less the venous pressure. These predicted values of blood flow were also expressed as a percentage of the initial values.

Previous studies have shown that in healthy individuals calf blood flow, expressed as a percentage of baseline values groups does not change significantly as the venous congestion pressure was increased in small cumulative steps  and remains significantly greater than that predicted from the Darcy equation 3.

**Muscle strength.** Muscle strength was assessed by measurement of handgrip strength using a Jamar dynamometer (Promedics, Blackburn UK). The subjects were seated with their arms rested on the arms of a chair, and the sides altered between each measurement. For the analysis, we used the best score out of the total of three measurements from each hand 4.

**Cardiorespiratory fitness and physical activity energy expenditure.** Cardiorespiratory fitness was quantified by measurement of maximal oxygen consumption during the incremental treadmill test. Volunteers were fitted with an air-tight facemask for analysis of expired air and breath-by-breath analysis of oxygen consumption and CO2 production was made using a Cortex Metalyser instrument (Cortex Biophysik, Germany). The treadmill test was commenced at 1.3 m/s (3 miles/h) and 0% gradient. The gradient or speed increased alternately by 2% increments every 2 min (i.e. stage 1: 1.3 m/s, 0% gradient; stage 2: 1.3 m/s, 2% gradient; stage 3:1.55 m/s, 2% gradient.). Volunteers were asked to continue to exhaustion and until the respiratory exchange ratio (RER) was >1.1 unless they experienced chest pain or felt unwell.

**Physical activity.** The activity monitor device, which was worn around the upper arm for 4 days, contains sensors for 2 plane accelerometry, near body temperature, skin temperature and the galvanic skin response. The stored output from the monitor was processed using the manufacturer’s software.

**Statistical analyses.** The normality of the data was checked by examining the distribution of each result and checking kurtosis and skewness of the data.

**Results**

**Fig 1**

**(a)**

**(b)**

**Fig 1** Raw trace of (a) Qa measurement and (b) Kf small step plethysmography with added Qa measurement at each pressure step in lower limb using strain gauge plethysmography in a single individual. The upper trace (a) depicts the responses to the three initial 50 mmHg pressure steps used for the assessment of Qa. The taller, rectilinear responses reflect the pressure steps. Below this the slower, curvilinear traces reflect the calf volume responses to the increase in pressure. The lower trace (b) shows the complete recording from this study. On the extreme left are the 3 blood flow measurements (Qa) depicted in (a). These are followed by the progressive rectilinear increases in pressure, representing the cumulative cuff pressure increases and the brief increases in pressure to 80 mmHg at the end of each cumulative pressure step, for the assessment of Qa at each step. The slower, curvilinear trace reflects the calf volume response to each of these cumulative pressure steps.

Fig 1 shows a representative record of the raw microvascular data from one participant. The upper trace (a) depicts the responses to the three initial 50 mmHg pressure steps used for the assessment of Qa. The taller, rectilinear responses reflect the pressure steps. Below this the slower, curvilinear traces reflect the calf volume responses to the increase in pressure. The lower trace (b) shows the complete recording from this participant. On the extreme left are the 3 blood flow measurements (Qa) depicted in fig. 1a above. These are followed by the progressive rectilinear increases in pressure, representing the cumulative cuff pressure increases. We also see the pressure trace briefly increasing to 80 mmHg at the end of each cumulative pressure step, facilitating the assessment of Qa at each step. The slower, curvilinear trace reflects the calf volume response to each of these cumulative pressure steps. Fluid filtration (Jv) is measured from the slope of the last 2 minutes of the volume response. Kf is derived from the relationship between Jv and Pcuff. Pvi is derived by back-extrapolation of Kf to the abscissa, where Jv = zero 5.

In healthy individuals it has been previously observed that blood flow (Qa) remained constant 6, 7 even as congestion pressures approached mean arterial pressure and significantly greater than that predicted by the Darcy equation, which they attributed to a progressive reduction in precapillary resistance due to retrograde transmission of vasodilatory signals via the endothelium. In patients with preeclampsia and marked endothelial dysfunction, blood flow was not sustained in the face of increasing venous congestion pressure. If we take the endothelial cell dysfunction of pre-eclampsia as a model 6, the difference that we see suggests that many of our study participants are unable to sustain an appropriate limb perfusion in the face of increasing venous pressure and may thus also have profound endothelial dysfunction,.

**Fig 2** Association between mean hand grip strength ([right + left] / 2) and isolumetric pressure (Pvi) from 39 participants at baseline (r=-0.55, p<0.001).

**Discussion**

Mean resting limb blood flow (Qa) measured using venous congestion plethysmography was higher in our patient cohort than that reported previously in young healthy 7 or in older overweight and obese individuals 8. The lowest values of Qa were observed in the more active, fitter individuals with low blood pressure, greater insulin sensitivity and less evidence of inflammation. Whether the raised resting Qa in some of our cohort is evidence of chronic dilator state or a function of increased adiposity, and hence non nutrient blood flow to the tissue, remains to be elucidated. Resting muscle microvascular perfusion is influenced by local capacity for vasodilatation. In people with insulin resistance it is plausible that metabolites released from excess lipid processing down-regulate the dilator pathway and up-regulate the endothelin-1 mediated vasoconstrictor pathway. This is supported by our finding that the ability to sustain blood flow to the muscle is severely compromised in our subjects. Previous studies have shown that in healthy individuals Qa remains constant at increasing congestion pressure (Pv) (see 5) but that Qa is not maintained in individuals with generalized vascular dysfunction 2. The authors argued that these observations were suggestive of a progressive reduction in pre-capillary resistance associated with endothelial dysfunction and an altered arteriovenous signaling mechanism. Examination of the relationship between Qa and Pv provides strong evidence for profound endothelial dysfunction in the healthy individuals with central obesity and decreased insulin sensitivity recruited into the current study. Together these data suggest that both muscle microvascular perfusion and surface area available for exchange are reduced in these individuals with consequent effects on important aspects of muscle function relating to nutrient handling.

**REFERENCES**

(1) Liu D, Moberg E, Kollind M, Lins PE, Adamson U, Macdonald IA. Arterial, arterialized venous, venous and capillary blood glucose measurements in normal man during hyperinsulinaemic euglycaemia and hypoglycaemia. *Diabetologia* 1992 March;35(3):287-90.

(2) nim-Nyame N, Sooranna SR, Johnson MR, Sullivan MH, Gamble J, Steer PJ. Impaired retrograde transmission of vasodilatory signals via the endothelium in pre-eclampsia: a cause of reduced tissue blood flow? *Clin Sci (Lond)* 2004 January;106(1):19-25.

(3) nim-Nyame N, Sooranna SR, Johnson MR, Gamble J, Steer PJ. Resting peripheral blood flow in normal pregnancy and in pre-eclampsia. *Clin Sci (Lond)* 2000 December;99(6):505-10.

(4) Sayer AA, Syddall HE, Dennison EM, Martin HJ, Phillips DI, Cooper C, Byrne CD. Grip strength and the metabolic syndrome: findings from the Hertfordshire Cohort Study. *QJM* 2007 November;100(11):707-13.

(5) Gamble J, Gartside IB, Christ F. A reassessment of mercury in silastic strain gauge plethysmography for microvascular permeability assessment in man. *J Physiol* 1993 May;464:407-22.

(6) nim-Nyame N, Gamble J, Sooranna SR, Johnson MR, Sullivan MH, Steer PJ. Evidence of impaired microvascular function in pre-eclampsia: a non-invasive study. *Clin Sci (Lond)* 2003 April;104(4):405-12.

(7) Gamble J, Christ F, Gartside IB. Human calf precapillary resistance decreases in response to small cumulative increases in venous congestion pressure. *Journal Of Physiology-London* 1998;507:611-7.

(8) Acree LS, Montgomery PS, Gardner AW. The influence of obesity on arterial compliance in adult men and women. *Vasc Med* 2007 August;12(3):183-8.
